# Supplementary material for: Systematisches Review zur Schätzung der Prävalenz entzündlich rheumatischer Erkrankungen in Deutschland
Source: Springer Nature journal article supplement (doi:10.1007/s00393-022-01305-2), 2023-01-02

## Suchstrategie zur systematischen Literatursuche zur Prävalenz entzündlich-rheumatischer Erkrankungen in Deutschland

PubMed/Medline:

("prevalence"[MeSH Terms] OR "prevalence"[Title/Abstract] OR "frequencies"[Title/Abstract]) AND ("rheumatic disease\*" [Title/abstract] OR "rheumatoid arthritis"[Title/Abstract] OR "ankylosing spondylitis" [Title/abstract] OR "spondyloarthritis" [Title/abstract] OR "juvenile arthritis" [title/abstract] OR "systemic lupus erythematosus" [Title/abstract] OR "polymyalgia rheumatica"[Title/abstract] OR "psoriatic arthritis"[Title/abstract] OR "myositis"[Title/abstract]) OR "giant cell arteritis"[Title/abstract] OR "sjogren\*" [Title/abstract] OR "ANCA-associated vasculitis"[Title/abstract]) AND ("german"[Title/Abstract] OR "Germany"[Title/Abstract]) AND 2014/01/01:2022/10/31[Date - Publication]

Flow chart

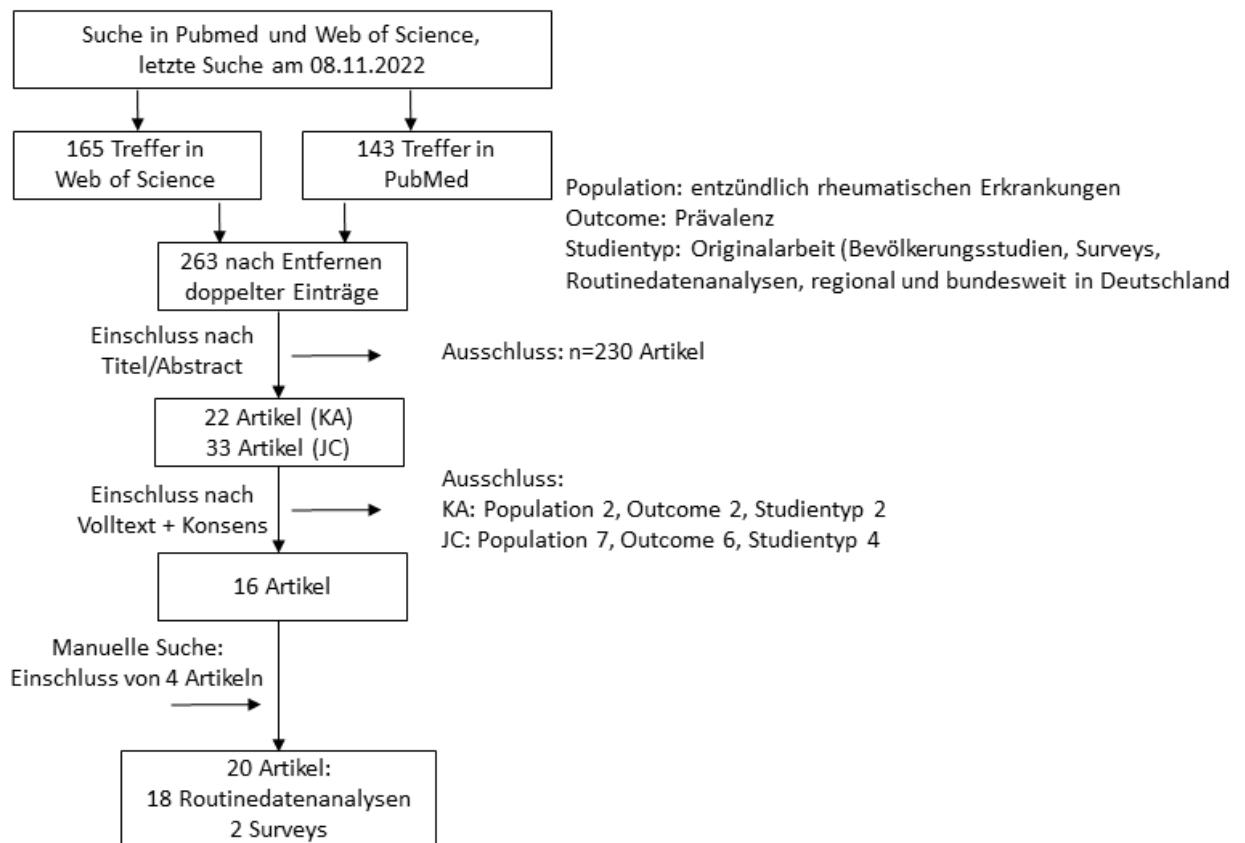

Supplement: MOESM1 [file 23881498]
